# Supplementary material for: Aerobic BTEX biodegradation increases yield of perfluoroalkyl carboxylic acids from biotransformation of a polyfluoroalkyl surfactant, 6:2 FtTAoS
Source: Royal Society of Chemistry journal article supplement (doi:10.1039/d1em00494h), 2022-01-01
Supplement: d1em00494h1.pdf [file d1em00494h1.pdf]

**Aerobic BTEX biodegradation Increases Yield of Perfluoroalkyl Carboxylic Acids from  
Biotransformation of a Polyfluoroalkyl Surfactant, 6:2 FtTAoS**

Electronic Supplementary Information

Christopher I. Olivares, Shan Yi, Emily K. Cook, Youn Jeong Choi, Renato Montagnolli.  
Adam Byrne, Christopher P. Higgins, David L. Sedlak, Lisa Alvarez-Cohen\*

\*Corresponding Author: Lisa Alvarez-Cohen (lisaac@berkeley.edu)

Table of Contents

Supplemental Methods

|           |                                                                       |
|-----------|-----------------------------------------------------------------------|
| Figure S1 | Organic Carbon Mass Balance                                           |
| Figure S2 | Autoclaved and Medium-Only Controls                                   |
| Figure S3 | Chromatography and MSMS Spectrum of 6:2 FTTh-OHPrA                    |
| Figure S4 | Gel electrophoresis Image of Toluene Dioxygenase (TDO) in enrichments |
| Table S1  | First-order 6:2 FtTAoS transformation rates                           |
| Table S2  | Additional targeted analyses on Day 60 (5:3 FTCA, 6:2 FTUCA)          |

## Supplemental Methods

### *Total oxidizable precursor (TOP) assay*

The total oxidizable precursor (TOP) assay was performed as described previously.<sup>10</sup> Briefly, 100  $\mu$ L of aqueous microcosm slurry was added to 6 mL of 60 mM  $K_2S_2O_8$  and 200 mM NaOH, and incubated at 85 °C overnight. At the end of the reaction, samples were cooled to room temperature and their pH was adjusted to 5-8 with 4M HCl. 1 mL methanol was added to quench any residual oxidants. Samples were then prepared for LC-MS/MS as described in the main text (internal standard addition, dilution in LCMS grade methanol).

### *GC-FID*

BTEX compounds were measured by injecting 100  $\mu$ L of headspace air into a gas chromatograph (GC) coupled to flame-ionization detection (FID) equipped with a GS-GasPro column (Agilent Technologies). The oven was set initially at 50 °C for two minutes, followed by a 50 °C  $\text{min}^{-1}$  ramp to 260 °C and held at 260 °C for two minutes. The retention times for benzene, toluene, ethylbenzene, and o-xylene were 3.9, 4.8, 5.6, 5.8 min, respectively. The injection port and detector temperatures were kept at 250 °C. The limit of detection (LOD) was determined as 3 $\times$  the height of the baseline and the limit of quantification (LOQ) was determined as 2 $\times$  LOD. The LOQs were (in  $\mu$ g): benzene (0.10), toluene (0.14), ethylbenzene (0.12), and o-xylene (0.39).

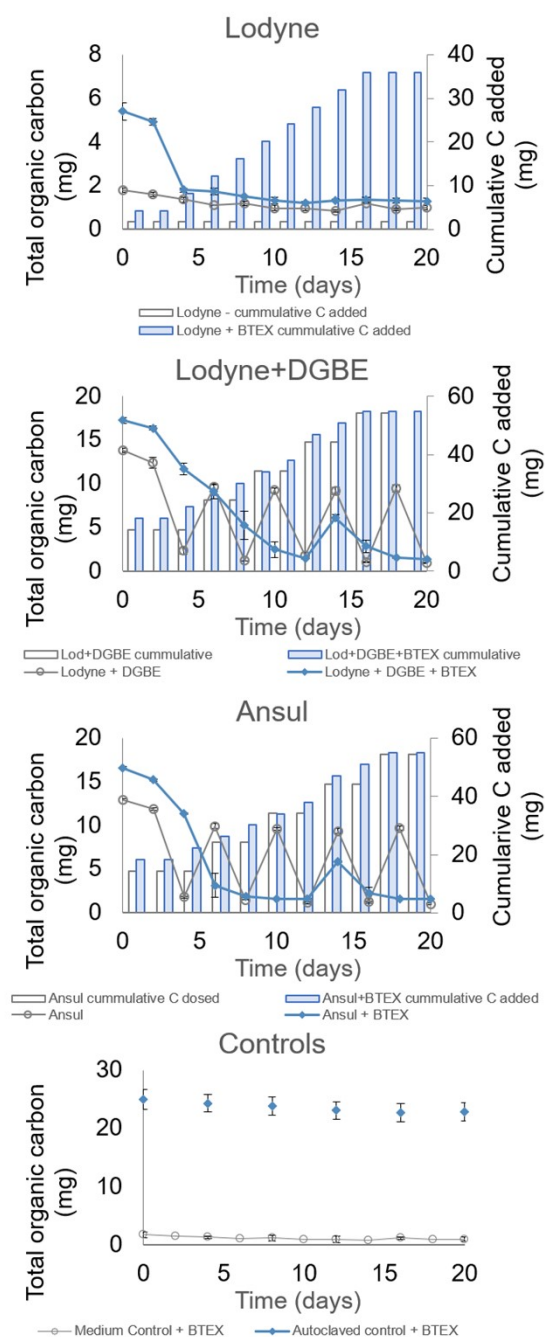

**Figure S1.** Organic carbon mass balances in biotransformation microcosms

**A**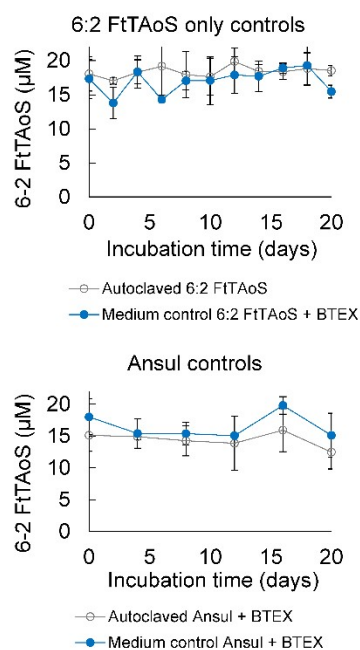**B**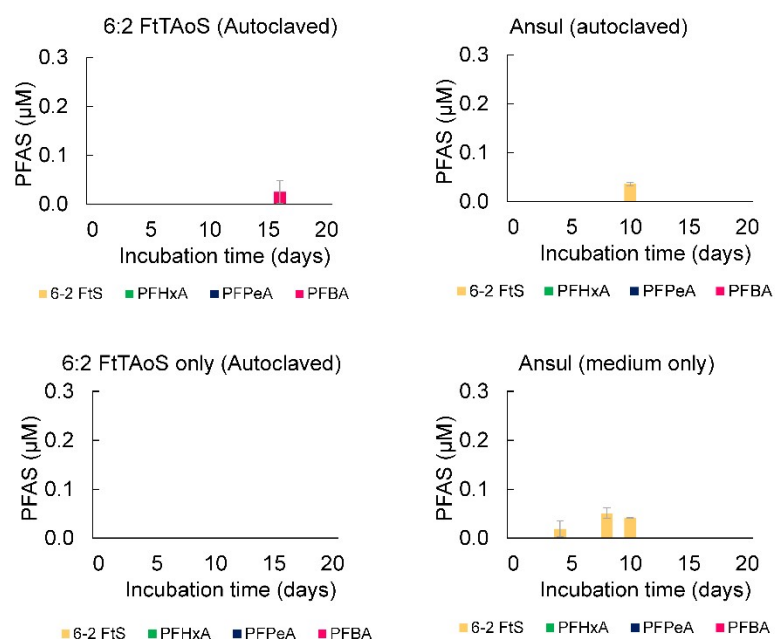

**Figure S2.** Autoclaved and medium-only controls. Panel A: Organic carbon mass balance, Panel B: Transformation products detected.

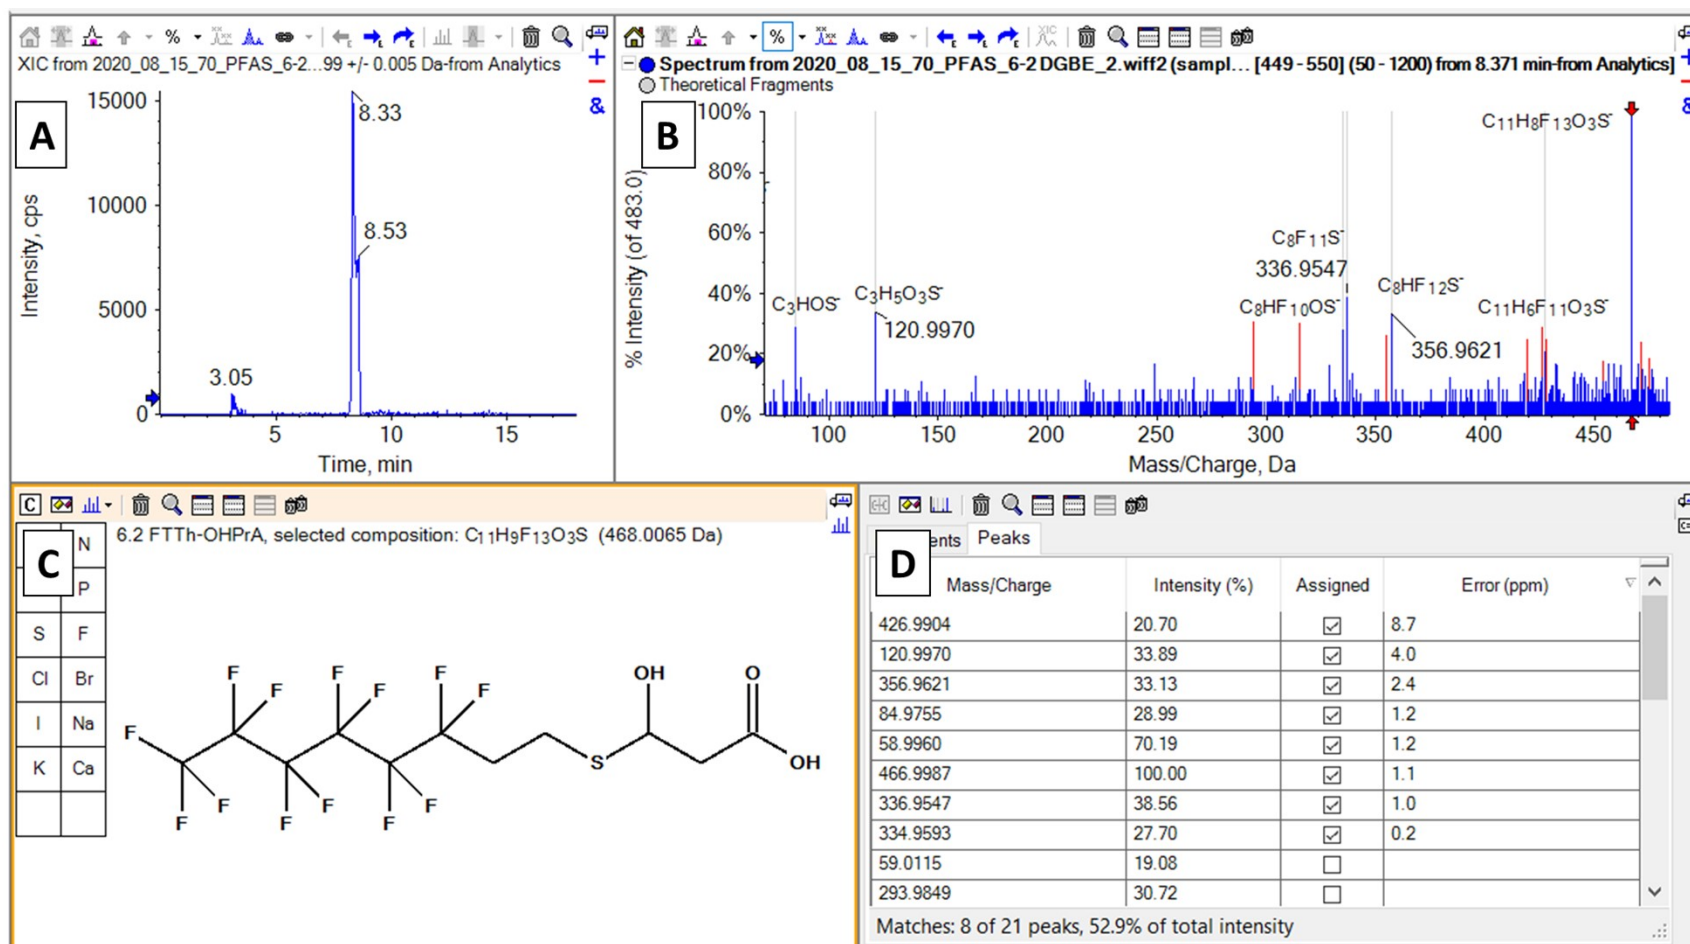

**Figure S3.** Chromatography and MSMS spectrum for confirmation of 6:2 FTTh-OHPra. A: Extracted ion chromatography at precursor mass 499.999 m/z; B: Fragmentation (MS/MS) spectrum at retention time 8.37 min for precursor mass 499.999 m/z, captions on the fragment are possible fragment predicted from its tentative structure; C: structure of 6:2 FTTh-OHPra; D: Predicted fragment from the structure. Mass tolerance for the fragment to MSMS spectra in C was 20 ppm. 6:2 FTSO-PrA generated only 84.9755, 334.9593, 426.9904, and 466.9987. Sciex OS 1.7 Explorer was used for data analysis.

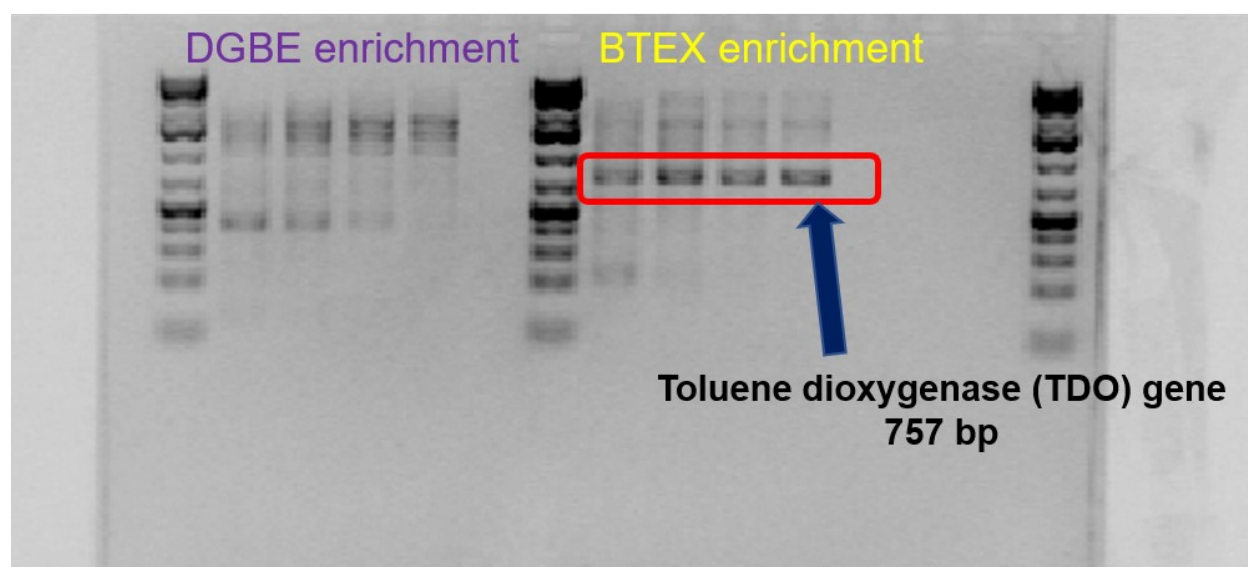

**Figure S4.** Gel electrophoresis image of AFFF-impacted solids enrichments selecting for DGBE biodegradation (left bands), and BTEX biodegradation (right bands). Four biological replicates each.

**Table S1.** First-order 6:2 FtTAoS biotransformation rate constants and R-squared values. Wilcoxon Rank Sums test performed in comparison with 6:2 FtTAoS only (no BTEX) treatment.

|                                         | 6:2 FtTAoS only |           | 6:2 FtTAoS + DGBE |            | Ansul AFFF |           |
|-----------------------------------------|-----------------|-----------|-------------------|------------|------------|-----------|
|                                         | No BTEX         | BTEX      | No BTEX           | BTEX       | No BTEX    | BTEX      |
| <b>Rate (d<sup>-1</sup>)</b>            | 0.11±0.02       | 0.11±0.02 | 0.18±0.02         | 0.23±0.02  | 0.19±0.06  | 0.17±0.03 |
| <b>R<sup>2</sup></b>                    | 0.9572          | 0.8795    | 0.95              | 0.8849     | 0.9051     | 0.95587   |
| <b>Range</b>                            | days 0-18       | days 0-10 | days 0-14         | days 4-10* | days 0-12  | days 0-18 |
| <b>Wilcoxon Rank Sum Test (p value)</b> | N/A             | 0.7125    | 0.3777            | 0.3404     | 0.2189     | 0.1978    |

\* For this treatment, there was a lag phase (days 0-4) that was not considered to calculate the rate

**Table S2.** Additional targeted analysis transformation products detected with high-resolution mass spectrometry collected in ESI- mode at day 60. Average concentration and t-test between BTEX and DGBE enrichment microcosms (biological triplicates, n=3). **Compounds in red were more abundant in BTEX enrichment.** **Compounds in blue were more abundant in the DGBE enrichments.** Minimum Reporting Level (MRL) = 0.1 µg/L

| Compound | DGBE | BTEX | T-test | Confidence level |
|----------|------|------|--------|------------------|
|----------|------|------|--------|------------------|

| name      | Enrichment<br>(µg/L) | Enrichment<br>(µg/L) | p ≤0.05(*) | based on<br>Shymanski et al. <sup>1</sup> |
|-----------|----------------------|----------------------|------------|-------------------------------------------|
| 5:3 FTCA  | < MRL                | 0.52±0.14            | *          | 1                                         |
| 6:2 FTUCA | 0.97±0.06            | 0.22±0.13            | 0.06       | 1                                         |

## References:

- (1) Schymanski, E. L.; Jeon, J.; Gulde, R.; Fenner, K.; Ruff, M.; Singer, H. P.; Hollender, J. Identifying Small Molecules via High Resolution Mass Spectrometry: Communicating Confidence. *Environ. Sci. Technol.* **2014**, *48* (4), 2097–2098.
